# Supplementary material
Source: PubMed Central journal article supplement (PMC5472377)

Supplementary Table 1. Genes included in FoundationOne assay

|                            |                            |               |               |                            |                          |                         |                 |                |                                     |
|----------------------------|----------------------------|---------------|---------------|----------------------------|--------------------------|-------------------------|-----------------|----------------|-------------------------------------|
| <i>ABL1</i>                | <i>BRAF</i>                | <i>CHEK1</i>  | <i>FANCC</i>  | <i>GATA3</i>               | <i>JAK2</i>              | <i>MITF</i>             | <i>PDCD1LG2</i> | <i>RBM10</i>   | <i>STAT4</i>                        |
| <i>ABL2</i>                | <i>BRCA1</i>               | <i>CHEK2</i>  | <i>FANCD2</i> | <i>GATA4</i>               | <i>JAK3</i>              | <i>MLH1</i>             | <i>PDGFRA</i>   | <i>RET</i>     | <i>STK11</i>                        |
| <i>ACVR1B</i>              | <i>BRCA2</i>               | <i>CIC</i>    | <i>FANCE</i>  | <i>GATA6</i>               | <i>JUN</i>               | <i>MPL</i>              | <i>PDGFRB</i>   | <i>RICTOR</i>  | <i>SUFU</i>                         |
| <i>AKT1</i>                | <i>BRD4</i>                | <i>CREBBP</i> | <i>FANCF</i>  | <i>GID4<br/>(C17orf39)</i> | <i>KAT8A<br/>(MYST3)</i> | <i>MRE11A</i>           | <i>PDK1</i>     | <i>RNF43</i>   | <i>SYK</i>                          |
| <i>AKT2</i>                | <i>BRIP1</i>               | <i>CRKL</i>   | <i>FANCG</i>  | <i>GLI1</i>                | <i>KDM5A</i>             | <i>MSH2</i>             | <i>PIK3C2B</i>  | <i>ROS1</i>    | <i>TAF1</i>                         |
| <i>AKT3</i>                | <i>BTG1</i>                | <i>CRLF2</i>  | <i>FANCL</i>  | <i>GNA11</i>               | <i>KDM5C</i>             | <i>MSH6</i>             | <i>PIK3CA</i>   | <i>RPTOR</i>   | <i>TBX3</i>                         |
| <i>ALK</i>                 | <i>BTK</i>                 | <i>CSF1R</i>  | <i>FAS</i>    | <i>GNA13</i>               | <i>KDM6A</i>             | <i>MTOR</i>             | <i>PIK3CB</i>   | <i>RUNX1</i>   | <i>TERC</i>                         |
| <i>AMER1<br/>(FAM123B)</i> | <i>C11orf30<br/>(EMSY)</i> | <i>CTCF</i>   | <i>FAT1</i>   | <i>GNAQ</i>                | <i>KDR</i>               | <i>MUTYH</i>            | <i>PIK3CG</i>   | <i>RUNX1T1</i> | <i>TERT<br/>(promoter<br/>only)</i> |
| <i>APC</i>                 | <i>CARD11</i>              | <i>CTNNA1</i> | <i>FBXW7</i>  | <i>GNAS</i>                | <i>KEAP1</i>             | <i>MYC</i>              | <i>PIK3R1</i>   | <i>SDHA</i>    | <i>TET2</i>                         |
| <i>AR</i>                  | <i>CBFB</i>                | <i>CTNNB1</i> | <i>FGF10</i>  | <i>GPR124</i>              | <i>KEL</i>               | <i>MYCL<br/>(MYCL1)</i> | <i>PIK3R2</i>   | <i>SDHB</i>    | <i>TGFBR2</i>                       |
| <i>ARAF</i>                | <i>CBL</i>                 | <i>CUL3</i>   | <i>FGF14</i>  | <i>GRIN2A</i>              | <i>KIT</i>               | <i>MYCN</i>             | <i>PLCG2</i>    | <i>SDHC</i>    | <i>TNFAIP3</i>                      |
| <i>ARFRP1</i>              | <i>CCND1</i>               | <i>CYLD</i>   | <i>FGF19</i>  | <i>GRM3</i>                | <i>KLHL6</i>             | <i>MYD88</i>            | <i>PMS2</i>     | <i>SDHD</i>    | <i>TNFRSF14</i>                     |
| <i>ARID1A</i>              | <i>CCND2</i>               | <i>DAXX</i>   | <i>FGF23</i>  | <i>GSK3B</i>               | <i>KMT2A<br/>(MLL)</i>   | <i>NF1</i>              | <i>POLD1</i>    | <i>SETD2</i>   | <i>TOP1</i>                         |
| <i>ARID1B</i>              | <i>CCND3</i>               | <i>DDR2</i>   | <i>FGF3</i>   | <i>H3F3A</i>               | <i>KMT2C<br/>(MLL3)</i>  | <i>NF2</i>              | <i>POLE</i>     | <i>SF3B1</i>   | <i>TOP2A</i>                        |
| <i>ARID2</i>               | <i>CCNE1</i>               | <i>DICER1</i> | <i>FGF4</i>   | <i>HGF</i>                 | <i>KMT2D<br/>(MLL2)</i>  | <i>NFE2L2</i>           | <i>PPP2R1A</i>  | <i>SLIT2</i>   | <i>TP53</i>                         |
| <i>ASXL1</i>               | <i>CD274</i>               | <i>DNMT3A</i> | <i>FGF6</i>   | <i>HNF1A</i>               | <i>KRAS</i>              | <i>NFKBIA</i>           | <i>PRDM1</i>    | <i>SMAD2</i>   | <i>TSC1</i>                         |
| <i>ATM</i>                 | <i>CD79A</i>               | <i>DOT1L</i>  | <i>FGFR1</i>  | <i>HRAS</i>                | <i>LMO1</i>              | <i>NKX2-1</i>           | <i>PREX2</i>    | <i>SMAD3</i>   | <i>TSC2</i>                         |
| <i>ATR</i>                 | <i>CD79B</i>               | <i>EGFR</i>   | <i>FGFR2</i>  | <i>HSD3B1</i>              | <i>LRP1B</i>             | <i>NOTCH1</i>           | <i>PRKAR1A</i>  | <i>SMAD4</i>   | <i>TSHR</i>                         |
| <i>ATRX</i>                | <i>CDC73</i>               | <i>EP300</i>  | <i>FGFR3</i>  | <i>HSP90AA1</i>            | <i>LYN</i>               | <i>NOTCH2</i>           | <i>PRKCI</i>    | <i>SMARCA4</i> | <i>U2AF1</i>                        |
| <i>AURKA</i>               | <i>CDH1</i>                | <i>EPHA3</i>  | <i>FGFR4</i>  | <i>IDH1</i>                | <i>LZTR1</i>             | <i>NOTCH3</i>           | <i>PRKDC</i>    | <i>SMARCB1</i> | <i>VEGFA</i>                        |
| <i>AURKB</i>               | <i>CDK12</i>               | <i>EPHA5</i>  | <i>FH</i>     | <i>IDH2</i>                | <i>MAGI2</i>             | <i>NPM1</i>             | <i>PRSS8</i>    | <i>SMO</i>     | <i>VHL</i>                          |
| <i>AXIN1</i>               | <i>CDK4</i>                | <i>EPHA7</i>  | <i>FLCN</i>   | <i>IGF1R</i>               | <i>MAP2K1</i>            | <i>NRAS</i>             | <i>PTCH1</i>    | <i>SNCAIP</i>  | <i>WISP3</i>                        |
| <i>AXL</i>                 | <i>CDK6</i>                | <i>EPHB1</i>  | <i>FLT1</i>   | <i>IGF2</i>                | <i>MAP2K2</i>            | <i>NSD1</i>             | <i>PTEN</i>     | <i>SOCS1</i>   | <i>WT1</i>                          |
| <i>BAP1</i>                | <i>CDK8</i>                | <i>ERBB2</i>  | <i>FLT3</i>   | <i>IKBKE</i>               | <i>MAP2K4</i>            | <i>NTRK1</i>            | <i>PTPN11</i>   | <i>SOX10</i>   | <i>XPO1</i>                         |
| <i>BARD1</i>               | <i>CDKN1A</i>              | <i>ERBB3</i>  | <i>FLT4</i>   | <i>IKZF1</i>               | <i>MAP3K1</i>            | <i>NTRK2</i>            | <i>QKI</i>      | <i>SOX2</i>    | <i>ZBTB2</i>                        |
| <i>BCL2</i>                | <i>CDKN1B</i>              | <i>ERBB4</i>  | <i>FOXL2</i>  | <i>IL7R</i>                | <i>MCL1</i>              | <i>NTRK3</i>            | <i>RAC1</i>     | <i>SOX9</i>    | <i>ZNF217</i>                       |
| <i>BCL2L1</i>              | <i>CDKN2A</i>              | <i>ERG</i>    | <i>FOXP1</i>  | <i>INHBA</i>               | <i>MDM2</i>              | <i>NUP93</i>            | <i>RAD50</i>    | <i>SPEN</i>    | <i>ZNF703</i>                       |
| <i>BCL2L2</i>              | <i>CDKN2B</i>              | <i>ERRF1</i>  | <i>FRS2</i>   | <i>INPP4B</i>              | <i>MDM4</i>              | <i>PAK3</i>             | <i>RAD51</i>    | <i>SPOP</i>    |                                     |
| <i>BCL6</i>                | <i>CDKN2C</i>              | <i>ESR1</i>   | <i>FUBP1</i>  | <i>IRF2</i>                | <i>MED12</i>             | <i>PALB2</i>            | <i>RAF1</i>     | <i>SPTA1</i>   |                                     |
| <i>BCOR</i>                | <i>CEBPA</i>               | <i>EZH2</i>   | <i>GABRA6</i> | <i>IRF4</i>                | <i>MEF2B</i>             | <i>PARK2</i>            | <i>RANBP2</i>   | <i>SRC</i>     |                                     |
| <i>BCORL1</i>              | <i>CHD2</i>                | <i>FAM46C</i> | <i>GATA1</i>  | <i>IRS2</i>                | <i>MEN1</i>              | <i>PAX5</i>             | <i>RARA</i>     | <i>STAG2</i>   |                                     |
| <i>BLM</i>                 | <i>CHD4</i>                | <i>FANCA</i>  | <i>GATA2</i>  | <i>JAK1</i>                | <i>MET</i>               | <i>PBRM1</i>            | <i>RB1</i>      | <i>STAT3</i>   |                                     |

| Select Rearrangements |              |             |             |              |             |               |               |             |                |
|-----------------------|--------------|-------------|-------------|--------------|-------------|---------------|---------------|-------------|----------------|
| <i>ALK</i>            | <i>BRAF</i>  | <i>BRD4</i> | <i>ETV4</i> | <i>FGFR1</i> | <i>KIT</i>  | <i>MYC</i>    | <i>NTRK2</i>  | <i>RARA</i> | <i>TMPRSS2</i> |
| <i>BCL2</i>           | <i>BRCA1</i> | <i>EGFR</i> | <i>ETV5</i> | <i>FGFR2</i> | <i>MSH2</i> | <i>NOTCH2</i> | <i>PDGFRA</i> | <i>RET</i>  |                |
| <i>BCR</i>            | <i>BRCA2</i> | <i>ETV1</i> | <i>ETV6</i> | <i>FGFR3</i> | <i>MYB</i>  | <i>NTRK1</i>  | <i>RAF1</i>   | <i>ROS1</i> |                |

Supplementary Table 2. Genes included in MSK-IMPACT assay

|         |        |         |           |          |         |         |         |         |          |
|---------|--------|---------|-----------|----------|---------|---------|---------|---------|----------|
| ABL1    | BRCA1  | CTLA4   | FAM175A   | HIST1H3B | MAP2K1  | NFE2L2  | PLK2    | RNF43   | SYK      |
| AKT1    | BRCA2  | CTNNB1  | FAM46C    | HNF1A    | MAP2K2  | NKX2-1  | PMAIP1  | ROS1    | TBX3     |
| AKT2    | BRD4   | CUL3    | FANCA     | HRAS     | MAP2K4  | NKX3-1  | PMS1    | RPS6KA4 | TERT     |
| AKT3    | BRIP1  | DAXX    | FANCC     | ICOSLG   | MAP3K1  | NOTCH1  | PMS2    | RPS6KB2 | TET1     |
| ALK     | BTK    | DCUN1D1 | FAT1      | IDH1     | MAP3K13 | NOTCH2  | PNRC1   | RPTOR   | TET2     |
| ALOX12B | CARD11 | DDR2    | FBXW7     | IDH2     | MAPK1   | NOTCH3  | POLE    | RUNX1   | TGFBR1   |
| APC     | CASP8  | DICER1  | FGF19     | IFNGR1   | MAX     | NOTCH4  | PPP2R1A | RYBP    | TGFBR2   |
| AR      | CBFB   | DIS3    | FGF3      | IGF1     | MCL1    | NPM1    | PRDM1   | SDHA    | TMEM127  |
| ARAF    | CBL    | DNMT1   | FGF4      | IGF1R    | MDC1    | NRAS    | PRKAR1A | SDHAF2  | TMPRSS2  |
| ARID1A  | CCND1  | DNMT3A  | FGFR1     | IGF2     | MDM2    | NSD1    | PTCH1   | SDHB    | TNFAIP3  |
| ARID1B  | CCND2  | DNMT3B  | FGFR2     | IKBKE    | MDM4    | NTRK1   | PTEN    | SDHC    | TNFRSF14 |
| ARID2   | CCND3  | DOT1L   | FGFR3     | IKZF1    | MED12   | NTRK2   | PTPN11  | SDHD    | TOP1     |
| ARID5B  | CCNE1  | E2F3    | FGFR4     | IL10     | MEF2B   | NTRK3   | PTPRD   | SETD2   | TP53     |
| ASXL1   | CD274  | EED     | FH        | IL7R     | MEN1    | PAK1    | PTPRS   | SF3B1   | TP63     |
| ASXL2   | CD276  | EGFL7   | FLCN      | INPP4A   | MET     | PALB2   | PTPRT   | SH2D1A  | TRAF7    |
| ATM     | CD79B  | EGFR    | FLT1      | INPP4B   | MITF    | PARK2   | RAC1    | SHQ1    | TSC1     |
| ATR     | CDC73  | EIF1AX  | FLT3      | INSR     | MLH1    | PARP1   | RAD50   | SMAD2   | TSC2     |
| ATRX    | CDH1   | EP300   | FLT4      | IRF4     | MLL     | PAX5    | RAD51   | SMAD3   | TSHR     |
| AURKA   | CDK12  | EPCAM   | FOXA1     | IRS1     | MLL2    | PAK7    | RAD51B  | SMAD4   | U2AF1    |
| AURKB   | CDK4   | EPHA3   | FOXL2     | IRS2     | MLL3    | PBRM1   | RAD51C  | SMARCA4 | VHL      |
| AXIN1   | CDK6   | EPHA5   | FOXP1     | JAK1     | MPL     | PDCD1   | RAD51D  | SMARCB1 | VTCN1    |
| AXIN2   | CDK8   | EPHB1   | FUBP1     | JAK2     | MRE11A  | PDGFRA  | RAD52   | SMARCD1 | WT1      |
| AXL     | CDKN1A | ERBB2   | GATA1     | JAK3     | MSH2    | PDGFRB  | RAD54L  | SMO     | XIAP     |
| B2M     | CDKN1B | ERBB3   | GATA2     | JUN      | MSH6    | PDPK1   | RAF1    | SOCS1   | XPO1     |
| BAP1    | CDKN2A | ERBB4   | GATA3     | KDM5A    | MTOR    | PHOX2B  | RARA    | SOX17   | YAP1     |
| BARD1   | CDKN2B | ERCC2   | GNA11     | KDM5C    | MUTYH   | PIK3C2G | RASA1   | SOX2    | YES1     |
| BBC3    | CDKN2C | ERCC3   | GNAQ      | KDM6A    | MYC     | PIK3C3  | RB1     | SOX9    |          |
| BCL2    | CHEK1  | ERCC4   | GNAS      | KDR      | MYCL1   | PIK3CA  | RBM10   | SPEN    |          |
| BCL2L1  | CHEK2  | ERCC5   | GREM1     | KEAP1    | MYCN    | PIK3CB  | RECQL4  | SPOP    |          |
| BCL2L11 | CIC    | ERG     | GRIN2A    | KIT      | MYD88   | PIK3CD  | REL     | SRC     |          |
| BCL6    | CREBBP | ESR1    | GSK3B     | KLF4     | MYOD1   | PIK3CG  | RET     | STAG2   |          |
| BCOR    | CRKL   | ETV1    | H3F3C     | KRAS     | NBN     | PIK3R1  | RWD2    | STK11   |          |
| BLM     | CRLF2  | ETV6    | HGF       | LATS1    | NCOR1   | PIK3R2  | RHOA    | STK40   |          |
| BMPR1A  | CSF1R  | EZH2    | HIST1H1C  | LATS2    | NF1     | PIK3R3  | RICTOR  | SUFU    |          |
| BRAF    | CTCF   | FAM123B | HIST1H2BD | LMO1     | NF2     | PIM1    | RIT1    | SUZ12   |          |

Supplementary Table 3. Spectrum of *TP53* alterations

| Patient number                             | TP53 alteration         | Putative functional consequence | Duration of IBD | Stage of disease |
|--------------------------------------------|-------------------------|---------------------------------|-----------------|------------------|
| <b>CROHN'S DISEASE ASSOCIATED CASES</b>    |                         |                                 |                 |                  |
| 1                                          | R248W                   | GOF                             | >10 years       | 2                |
| 2                                          | P278S                   | GOF                             | >10 years       | 4                |
| 3                                          | D281E                   | unknown                         | >10 years       | 2                |
| 4                                          | R248Q                   | GOF                             | >10 years       | 1                |
| 5                                          | W146*                   | LOF                             | >10 years       | 4                |
| 6                                          | R213*                   | LOF                             | >10 years       | 3                |
| 7                                          | R282W                   | GOF                             | >10 years       | 4                |
| 8                                          | H193L                   | unknown                         | >10 years       | 4                |
| 9                                          | P152L                   | unknown                         | >10 years       | 1                |
| 10                                         | C176F                   | GOF                             | >10 years       | 2                |
| 11                                         | R248Q                   | GOF                             | >10 years       | 2                |
| 12                                         | R282W                   | GOF                             | <10 years       | 4                |
| 13                                         | V173L                   | GOF                             | <10 years       | 4                |
| 14                                         | P142L                   | unknown                         | >10 years       | 1                |
| 15                                         | Splice site<br>258+1G>A | unknown                         | >10 years       | 2                |
| 16                                         | R248W, A69V             | GOF,<br>unknown                 | <10 years       | 2                |
| 17                                         | Y234C                   | unknown                         | >10 years       | 3                |
| 18                                         | wild-type               |                                 | <10 years       | 3                |
| <b>ULCERATIVE COLITIS ASSOCIATED CASES</b> |                         |                                 |                 |                  |
| 19                                         | G199V                   | unknown                         | >10 years       | 1                |
| 20                                         | R248Q                   | GOF                             | <10 years       | 3                |
| 21                                         | R248Q                   | GOF                             | >10 years       | 1                |
| 22                                         | C229fs*                 | LOF                             | 10 years        | 1                |
| 23                                         | S241F                   | unknown                         | >10 years       | 3                |
| 24                                         | L130fs*, V73fs*         | LOF,<br>LOF                     | >10 years       | 1                |
| 25                                         | A161S, M160I            | unknown,<br>unknown             | >10 years       | 4                |
| 26                                         | R175H                   | GOF                             | >10 years       | 3                |
| 27                                         | R342*, R248W            | LOF,<br>GOF                     | <10 years       | 2                |
| 28                                         | G244D                   | unknown                         | >10 years       | 2                |

|    |                      |         |           |   |
|----|----------------------|---------|-----------|---|
| 29 | Splice site 783-1G>A | unknown | >10 years | 1 |
| 30 | L35fs                | LOF     | >10 years | 3 |
| 31 | R282W                | GOF     | >10 years | 1 |
| 32 | V172F                | unknown | <10 years | 1 |
| 33 | Y126H                | unknown | >10 years | 2 |
| 34 | R342*                | LOF     | >10 years | 3 |
| 35 | R273H                | GOF     | >10 years | 1 |
| 36 | R213*                | LOF     | >10 years | 3 |
| 37 | E285K                | unknown | >10 years | 3 |
| 38 | Y220C                | unknown | >10 years | 4 |
| 39 | Splice site 993+1G>T | unknown | >10 years | 3 |
| 40 | R196*                | LOF     | <10 years | 4 |
| 41 | M246V                | unknown | >10 years | 2 |
| 42 | R248Q                | GOF     | >10 years | 0 |
| 43 | P190del              | LOF     | >10 years | 1 |
| 44 | wild-type            |         | <10 years | 3 |
| 45 | wild-type            |         | >10 years | 1 |
| 46 | wild-type            |         | <10 years | 3 |
| 47 | wild-type            |         | >10 years | 1 |

\*GOF – gain-of-function, LOF – loss-of-function

Case numbers match order of cases in the oncoprint in Figure 1.

Supplementary Table 4. Clinical characteristics of patients whose tumors were studied. The Table also includes genomic alterations in *APC*, *MYC*, and *IDH1*.

| Patient number | IBD | Duration of IBD | Stage at diagnosis | Site of primary tumor | Special histology | <i>APC</i> status | <i>MYC</i> status | <i>IDH1</i> status |
|----------------|-----|-----------------|--------------------|-----------------------|-------------------|-------------------|-------------------|--------------------|
| 1              | CD  | >10 years       | 2                  | R colon               |                   | MUT               |                   | WT                 |
| 2              | CD  | >10 years       | 4                  | L colon               |                   | MUT               | AMP               | WT                 |
| 3              | CD  | >10 years       | 2                  | R colon               |                   | MUT               |                   | MUT                |
| 4              | CD  | >10 years       | 1                  | Rectum                |                   | MUT               |                   | WT                 |
| 5              | CD  | >10 years       | 4                  | R colon               |                   | MUT               |                   | WT                 |
| 6              | CD  | >10 years       | 3                  | Rectum                | signet ring       | MUT               |                   | WT                 |
| 7              | CD  | >10 years       | 4                  | L colon               |                   | WT                | AMP               | WT                 |
| 8              | CD  | >10 years       | 4                  | Ileum                 |                   | WT                |                   | WT                 |
| 9              | CD  | >10 years       | 1                  | Rectum                |                   | WT                |                   | WT                 |
| 10             | CD  | >10 years       | 2                  | R colon               |                   | WT                |                   | WT                 |
| 11             | CD  | >10 years       | 2                  | R colon               |                   | WT                | AMP               | MUT                |
| 12             | CD  | <10 years       | 4                  | R colon               |                   | WT                | AMP               | MUT                |
| 13             | CD  | <10 years       | 4                  | Ileum                 | signet ring       | WT                |                   | MUT                |
| 14             | CD  | >10 years       | 1                  | L colon               |                   | WT                |                   | MUT                |
| 15             | CD  | >10 years       | 2                  | Rectum                |                   | WT                |                   | WT                 |
| 16             | CD  | <10 years       | 2                  | R colon               |                   | WT                |                   | WT                 |
| 17             | CD  | >10 years       | 3                  | Rectum                |                   | WT                |                   | WT                 |
| 18             | CD  | <10 years       | 3                  | L colon               |                   | MUT               | AMP               | WT                 |
| 19             | UC  | >10 years       | 1                  | Rectum                |                   | MUT               | AMP               | WT                 |
| 20             | UC  | <10 years       | 3                  | R colon               | signet ring       | WT                | AMP               | WT                 |
| 21             | UC  | >10 years       | 1                  | L colon               |                   | WT                | AMP               | WT                 |
| 22             | UC  | 10 years        | 1                  | Rectosigmoid          |                   | WT                | AMP               | WT                 |
| 23             | UC  | >10 years       | 3                  | R colon               |                   | WT                |                   | WT                 |
| 24             | UC  | >10 years       | 1                  | Rectum                |                   | WT                |                   | WT                 |
| 25             | UC  | >10 years       | 4                  | Rectum                |                   | WT                |                   | WT                 |
| 26             | UC  | >10 years       | 3                  | L colon               | muinous           | WT                |                   | WT                 |
| 27             | UC  | <10 years       | 2                  | R colon               | muinous           | WT                |                   | WT                 |
| 28             | UC  | >10 years       | 2                  | R colon               |                   | WT                |                   | WT                 |
| 29             | UC  | >10 years       | 1                  | R colon               |                   | WT                |                   | WT                 |
| 30             | UC  | >10 years       | 3                  | Rectum                |                   | WT                | AMP               | WT                 |
| 31             | UC  | >10 years       | 1                  | Rectosigmoid          | signet ring       | WT                | AMP               | WT                 |
| 32             | UC  | <10 years       | 1                  | Rectosigmoid          |                   | WT                | AMP               | WT                 |
| 33             | UC  | >10 years       | 2                  | Rectum                | muinous           | WT                |                   | WT                 |
| 34             | UC  | >10 years       | 3                  | Rectum                |                   | WT                |                   | WT                 |
| 35             | UC  | >10 years       | 1                  | Rectosigmoid          |                   | WT                |                   | WT                 |
| 36             | UC  | >10 years       | 3                  | Rectosigmoid          |                   | WT                |                   | WT                 |
| 37             | UC  | >10 years       | 3                  | R colon               |                   | WT                |                   | WT                 |

|    |    |           |   |              |             |     |    |
|----|----|-----------|---|--------------|-------------|-----|----|
| 38 | UC | >10 years | 4 | Rectosigmoid | signet ring | WT  | WT |
| 39 | UC | >10 years | 3 | Rectum       | mucinous    | WT  | WT |
| 40 | UC | <10 years | 4 | R colon      |             | WT  | WT |
| 41 | UC | >10 years | 2 | Rectosigmoid |             | WT  | WT |
| 42 | UC | >10 years | 0 | Rectosigmoid | signet ring | WT  | WT |
| 43 | UC | >10 years | 1 | R colon      |             | WT  | WT |
| 44 | UC | <10 years | 3 | R colon      | mucinous    | MUT | WT |
| 45 | UC | >10 years | 1 | Rectum       |             | MUT | WT |
| 46 | UC | <10 years | 3 | R colon      |             | WT  | WT |
| 47 | UC | >10 years | 1 | R colon      |             | WT  | WT |

CD- Crohn's Disease; UC - Ulcerative colitis; R Colon- right-sided colon; L colon- left-side colon; - mutated gene; WT - wild-type gene; AMP – amplified gene. Special Histology indicates cases in which special histologic features within a well, moderately, or poorly differentiated adenocarcinoma was found on pathologic review. Neither *APC* mutations nor *MYC* amplification status were associated with the clinical features of duration of IBD prior to the diagnosis of CAC, stage or location of the primary tumor. IDH mutations were less likely to be found in rectal or sigmoid tumors.

Supplementary Table 5. Patient treatment for IBD

| Patient Number | IBD Type | Salicylates                  | Steroids | anti-TNF | Cytotoxics |
|----------------|----------|------------------------------|----------|----------|------------|
| 1              | CD       | Treatment data not available |          |          |            |
| 2              | CD       | X                            |          |          |            |
| 3              | CD       |                              |          |          |            |
| 4              | CD       | X                            |          |          |            |
| 5              | CD       |                              | X        |          |            |
| 6              | CD       |                              |          |          |            |
| 7              | CD       |                              | X        |          |            |
| 8              | CD       | X                            | X        | X        | X          |
| 9              | CD       |                              | X        |          |            |
| 10             | CD       | X                            |          |          |            |
| 11             | CD       | X                            | X        |          |            |
| 12             | CD       | X                            |          |          |            |
| 13             | CD       |                              |          |          |            |
| 14             | CD       | X                            |          |          |            |
| 15             | CD       | X                            |          |          |            |
| 16             | CD       | X                            |          |          |            |
| 17             | CD       | Treatment data not available |          |          |            |
| 18             | CD       |                              |          |          |            |
| 19             | UC       | Treatment data not available |          |          |            |
| 20             | UC       |                              |          | X        |            |
| 21             | UC       | X                            |          |          |            |
| 22             | UC       | X                            |          |          |            |
| 23             | UC       | X                            | X        |          |            |
| 24             | UC       | X                            | X        |          | X          |
| 25             | UC       | X                            |          |          |            |
| 26             | UC       | X                            | X        |          |            |
| 27             | UC       | X                            |          |          |            |
| 28             | UC       | X                            |          |          |            |
| 29             | UC       |                              |          |          |            |
| 30             | UC       | X                            |          | X        |            |
| 31             | UC       | X                            | X        |          |            |
| 32             | UC       |                              |          |          |            |
| 33             | UC       | Treatment data not available |          |          |            |
| 34             | UC       |                              | X        |          |            |
| 35             | UC       |                              | X        |          |            |
| 36             | UC       | X                            |          |          |            |
| 37             | UC       | X                            | X        |          |            |
| 38             | UC       |                              |          |          |            |
| 39             | UC       | X                            | X        |          |            |

|           |    |   |   |   |   |
|-----------|----|---|---|---|---|
| <b>40</b> | UC | X |   |   |   |
| <b>41</b> | UC | X |   |   |   |
| <b>42</b> | UC | X |   |   |   |
| <b>43</b> | UC |   |   |   |   |
| <b>44</b> | UC | X |   |   |   |
| <b>45</b> | UC |   |   |   | X |
| <b>46</b> | UC |   |   | X |   |
| <b>47</b> | UC | X | X |   |   |

Salicylates include sulfasalazine and mesalamine; steroids include budesonide, prednisone, and dexamethasone; cytotoxics include 6-mercaptopurine, azathioprine, and methotrexate; and anti-TNF agents include infliximab or adalimumab. Case numbers match order of cases in the oncoprint in Figure 1.



Supplementary Table 6. Comparison of Genomic Alterations Frequency in CAC in the current report, using NGS, with Genomic Alterations frequency in the same genes using whole exome analysis as reported by Robles *et al* (reference 21).

| Gene          | %mut CAC current study | %mut CAC Robles | %mut TCGA-CRC |
|---------------|------------------------|-----------------|---------------|
| <i>TP53</i>   | 89                     | 63              | 52            |
| <i>KRAS</i>   | 40                     | 20              | 42            |
| <i>SMAD4</i>  | 17                     | 13              | 14            |
| <i>SMAD2</i>  | 2                      | 10              | 8             |
| <i>SOX9</i>   | 2                      | 10              | 5             |
| <i>PIK3CA</i> | 6                      | 10              | 15            |
| <i>PREX2</i>  | 0                      | 10              | 6             |
| <i>APC</i>    | 21                     | 13              | 76            |
| <i>EP300</i>  | 0                      | 10              | 6             |
| <i>MTOR</i>   | 2                      | 10              | 7             |
| <i>GNAS</i>   | 13                     | NR              | 11            |
| <i>IDH1</i>   | 11                     | NR              | 1             |

NR – not reported.

### **Supplementary Figure Legends**

Supplementary Figure 1 - Mutation map showing the location of *TP53* mutations in the sequenced CAC cases. The different domains of *TP53* are marked in color: p53 transactivation motif (amino acids 5-29) in green, p53 DNA-binding domain (amino acids 95-289) in red, and p53 tetramerisation motif (amino acids 318-359) in blue. The height of the lollipops in the plot corresponds to the number of cases with each *TP53* variant, as indicated on the y-axis.

TP53

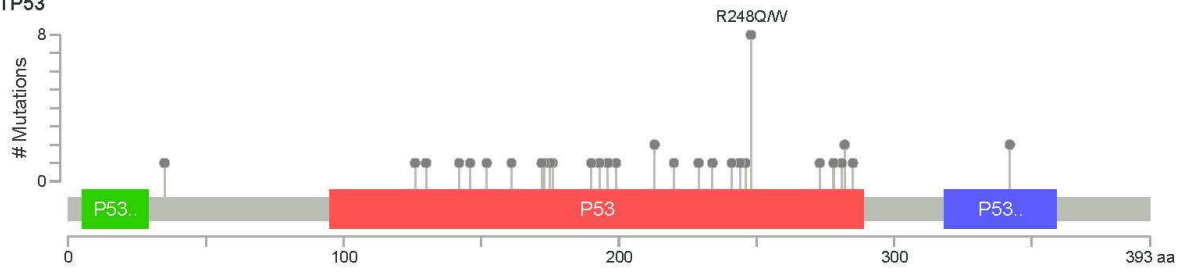

Supplement: NIHMS776583-supplement-supplement_1.pdf [file NIHMS776583-supplement-supplement_1.pdf]
